# Supplementary material for: The Efficacy of Combined Herbal Extracts Gel Preparation in the Prevention of Postsurgical Hypertrophic Scar Formation
Source: Springer Nature journal article supplement (doi:10.1007/s13555-014-0055-0), 2014-06-24
Supplement: MOESM1 [file 9271034]

- The purpose of this study was to evaluate the efficacy of the combined herbal extracts gel (CHG) in the prevention of surgical scar formation.
- All patients ( $N = 17$ ) were randomly assigned and treated with both the CHG and placebo gel for 12 weeks.
- The scars ( $N = 34$ ) were photographed and evaluated using the Patient and Observer Scar Assessment Scale (POSAS).
- The CHG group showed improved scores for almost all modalities from both patient and observer scores.
- The CHG demonstrated to be effective in the prevention of surgical scar formation.

This summary slide represents the opinions of the authors. No funding or sponsorship was received for this study or publication of this article. For a full list of acknowledgments and conflicts of interest for all authors of this article, please see the full text online. Copyright © The Author(s) 2014. Creative Commons Attribution Noncommercial License (CC BY-NC).
